# Supplementary material for: FHL1 Inhibits the Progression of Colorectal Cancer by Regulating the Wnt/β-Catenin Signaling Pathway
Source: PubMed Central journal article supplement (PMC8317513; doi:10.7150/jca.60543), 2021-07-03
Supplement: jcav12p5345s1.pdf [file jcav12p5345s1.pdf]

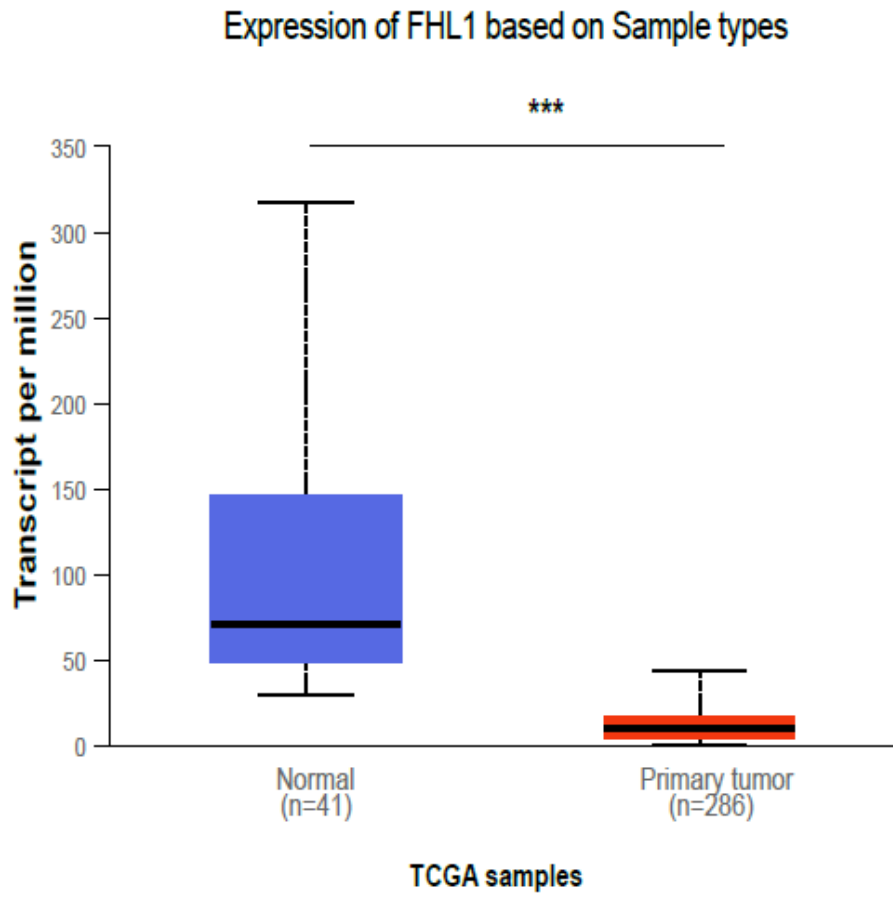

Fig.S1 FHL1 expression in colorectal cancer tissues and normal tissues from TCGA database.
